CORRECTION

# Correction: Evaluation of a community-based intervention to improve maternal and neonatal health service coverage in the most rural and remote districts of Zambia

**Choolwe Jacobs, Charles Michelo, Mumbi Chola, Nicholas Oliphant, Hikabasa Halwiindi, Sitali Maswenyeho, Kumar Sridutt Baboo, Mosa Moshabela**

There is an error in the title of [Table 3](#). The correct title is: Results of the logistic regression analysis of the factors related to the endline outcome of use of the three of the selected core indicators (ANC at least four times, SBA, PNC within 48 hours) over a three year time period.

There are errors in [Tables 1](#) and [3](#). The *p* values in both tables are incorrect. Please see the correct [Tables 1](#) and [3](#) here.

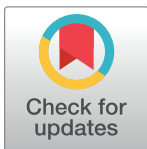

**OPEN ACCESS**

**Citation:** Jacobs C, Michelo C, Chola M, Oliphant N, Halwiindi H, Maswenyeho S, et al. (2018) Correction: Evaluation of a community-based intervention to improve maternal and neonatal health service coverage in the most rural and remote districts of Zambia. PLoS ONE 13(7): e0200324. <https://doi.org/10.1371/journal.pone.0200324>

**Published:** July 2, 2018

**Copyright:** © 2018 Jacobs et al. This is an open access article distributed under the terms of the [Creative Commons Attribution License](#), which permits unrestricted use, distribution, and reproduction in any medium, provided the original author and source are credited.

**Table 1. Characteristics of mothers at Baseline, Midline and Endline surveys for the intervention.**

| Variable                                                      | Baseline (n = 551) %(95% CI) | Midline (n = 550) %(95% CI) | Endline (n = 551) %(95% CI) | *** p value |
|---------------------------------------------------------------|------------------------------|-----------------------------|-----------------------------|-------------|
| <b>Individual Characteristics</b>                             |                              |                             |                             |             |
| <b>Age</b>                                                    |                              |                             |                             |             |
| 15–24                                                         | 40 (36–46)                   | 41 (36–45)                  | 43 (38–47)                  | 0.517       |
| 25 and above                                                  | 60 (56–64)                   | 59 (55–63)                  | 57 (52–61)                  |             |
| <b>Marital Status</b>                                         |                              |                             |                             |             |
| Not married                                                   | 35 (32–38)                   | 11 (9–14)                   | 13 (10–16)                  | <0.001      |
| Married                                                       | 65 (62–68)                   | 89 (86–91)                  | 87 (84–90)                  |             |
| <b>Ever attended school</b>                                   |                              |                             |                             |             |
| No                                                            | 20 (16–23)                   | 22 (18–25)                  | 17(13–19)                   | 0.117       |
| Yes                                                           | 80 (77–84)                   | 78 (74–81)                  | 83 (81–87)                  |             |
| <b>Level of education</b>                                     |                              |                             |                             |             |
| Never been to school                                          | 21(17–24)                    | 25 (21–29)                  | 20 (17–24)                  |             |
| Incomplete primary                                            | 53 (48–57)                   | 42 (38–46)                  | 42 (38–47)                  |             |
| Complete primary                                              | 16 (13–19)                   | 14(12–18)                   | 15 (12–18)                  |             |
| Post Primary*                                                 | 10 (8–13)                    | 19 (16–22)                  | 21 (18–25)                  | <0.001      |
| <b>Women’s Literacy</b>                                       |                              |                             |                             |             |
| Cannot read at all                                            | 63 (58–68)                   | 63 (58–67)                  | 59 (55–63)                  |             |
| Can read**                                                    | 37 (33–41)                   | 37 (33–41)                  | 41 (37–45)                  | 0.244       |
| <b>Received Messages on birth preparedness</b>                |                              |                             |                             |             |
| No                                                            | ##                           | 16 (13–19)                  | 10 (7–12)                   |             |
| Yes                                                           | ##                           | 84 (81–87)                  | 90 (87–93)                  | <0.001      |
| <b>Received Messages on birth preparedness from SMAG/ CHW</b> |                              |                             |                             |             |
| No                                                            | ##                           | 49 (37–47)                  | 31 (27–35)                  |             |
| Yes                                                           | ##                           | 51 (53 - .62)               | 69 (64–73)                  | <0.001      |
| <b>Community Characteristics</b>                              |                              |                             |                             |             |
| <b>Presence of a trained SMAG/CHW within the community</b>    |                              |                             |                             |             |
| No                                                            | ##                           | 53 (48–58)                  | 30 (25–36)                  |             |
| Yes                                                           | ##                           | 47 (43–51)                  | 70 (66–74)                  | <0.001      |
| <b>Distance to the health facility</b>                        |                              |                             |                             |             |
| Within 5 Km                                                   | ##                           | 47 (43–52)                  | 48 (43–52)                  |             |
| Beyond 5 km                                                   | ##                           | 53 (48–57)                  | 52 (48–56)                  | 0.975       |

\* Post primary means attempted and completed secondary;

## Variable not measured at baseline

\*\*Can read included those that could read part of the sentence;

\*\*\* p value calculated using the Pearson’s chi square test

<https://doi.org/10.1371/journal.pone.0200324.t001>

**Table 3. Results of the logistic regression analysis of the factors related to the endline outcome of use of the three selected core indicators (ANC at least four times, SBA, PNC with 48 hours by a SMAG) over a three year time period.**

| Variables                                                  | Proportions<br>N = 551% (n)** | ANC at least 4 times            |         | Skilled Birth Attendance        |         | postnatal care                  |         |
|------------------------------------------------------------|-------------------------------|---------------------------------|---------|---------------------------------|---------|---------------------------------|---------|
|                                                            |                               | Adjusted Odds Ratio<br>(95% CI) | P-value | Adjusted Odds Ratio<br>(95% CI) | P-value | Adjusted Odds Ratio<br>(95% CI) | P-value |
| <b>Mother's Literacy</b>                                   |                               |                                 |         |                                 |         |                                 |         |
| Cannot read at all                                         |                               | 1                               |         | 1                               |         | 1                               |         |
| Can read*                                                  |                               | 1.40 (0.96–2.03)                | 0.081   | 1.44 (1.14–1.99)                | 0.028   | 1.59 (1.17–2.66)                | 0.030   |
| <b>Distance to the health facility</b>                     |                               |                                 |         |                                 |         |                                 |         |
| Within 5 Km                                                | 48 (262)                      | 1                               |         | 1                               |         | 1                               |         |
| Beyond 5 km                                                | 52 (289)                      | 0.58 (0.45–0.75)                | <0.001  | 0.62 (0.47–0.81)                | <0.001  | 1.03 (0.79–1.35)                | 0.126   |
| <b>Received HIV test Results during Pregnancy</b>          |                               |                                 |         |                                 |         |                                 |         |
| No                                                         | 15 (84)                       |                                 |         | 1                               |         | 1                               |         |
| Yes                                                        | 85 (465)                      | #                               | #       | 1.72 (1.13–2.61)                | 0.012   | 2.04 (0.95–4.37)                | 0.068   |
| <b>Presence of a trained SMAG within the community</b>     |                               |                                 |         |                                 |         |                                 |         |
| No                                                         |                               | 1                               |         | 1                               |         | 1                               |         |
| Yes                                                        |                               | 1.20 (0.93–1.56)                | 0.160   | 1.29 (0.96–1.72)                | 0.096   | 1.86 (1.26–2.73)                | 0.002   |
| <b>*Received Messages on birth preparedness from SMAG</b>  |                               |                                 |         |                                 |         |                                 |         |
| No                                                         | 31 (158)                      |                                 |         |                                 |         |                                 |         |
| Yes                                                        | 69 (349)                      | 1                               |         | 1                               |         | 1                               |         |
|                                                            |                               | 1.70 (0.97–2.99)                | 0.065   | 1.49 (1.10–2.00)                | 0.009   | 1.76 (1.20–2.19)                | 0.004   |
| <b>Received one ANC visit provided by skilled provider</b> |                               |                                 |         |                                 |         |                                 |         |
| No                                                         | 33 (181)                      |                                 |         | 1                               |         | 1                               |         |
| Yes                                                        | 67 (366)                      | #                               |         | 4.01 (2.88–5.72)                | <0.001  | 2.11 (1.49–3.68)                | 0.008   |
| <b>Skilled Birth Attendance</b>                            |                               |                                 |         |                                 |         |                                 |         |
| No                                                         | 50 (276)                      |                                 |         |                                 |         | 1                               |         |
| Yes                                                        | 50 (273)                      | #                               |         | #                               |         | 2.41 (1.82–3.15)                | <0.001  |

# Predictor variable not included in the model for the individual outcome variable

\*Women that could read the whole sentence or part of the sentence;

\*\*Coverage at endline

<https://doi.org/10.1371/journal.pone.0200324.t002>

## Reference

1. Jacobs C, Michelo C, Chola M, Oliphant N, Halwiindi H, Maswenyeho S, et al. (2018) Evaluation of a community-based intervention to improve maternal and neonatal health service coverage in the most rural and remote districts of Zambia. *PLoS ONE* 13(1): e0190145. <https://doi.org/10.1371/journal.pone.0190145> PMID: 29337995
